# Supplementary material for: Spatially confined catalysis-enhanced high-temperature carbon dioxide electrolysis
Source: Royal Society of Chemistry journal article supplement (doi:10.1039/c4cp06125j), 2015-01-01

## SUPPORTING INFORMATION

### *Spatially confined catalysis enhanced high temperature carbon dioxide electrolysis*

Liming Yang,<sup>a</sup> Xingjian Xue,<sup>c</sup> Kui Xie<sup>a, b \*</sup>

<sup>a</sup> School of Materials Science and Engineering, Hefei University of Technology, No.193 Tunxi Road, Hefei, Anhui 230009, China.

<sup>b</sup> Fujian Institute of Research on the Structure of Matter, Chinese Academy of Sciences, 155 Yangqiao Road West, Fuzhou, 350002, China

<sup>c</sup> Department of Mechanical Engineering, University of South Carolina, 541 Main Street, Columbia, SC 29208, USA

\*Corresponding: [kxie@fjirsm.ac.cn](mailto:kxie@fjirsm.ac.cn)

**Fig. S1:** TEM results of oxidized of TO (a), reduced TO (b).

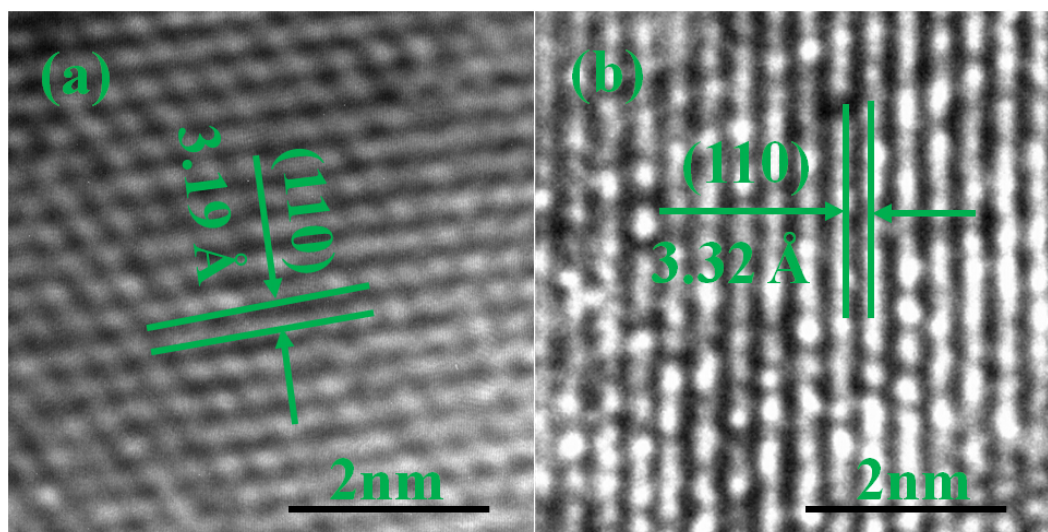

**Fig. S2:** XPS results of (a) Ti in oxidized TO; (b) Ti in reduced TO.

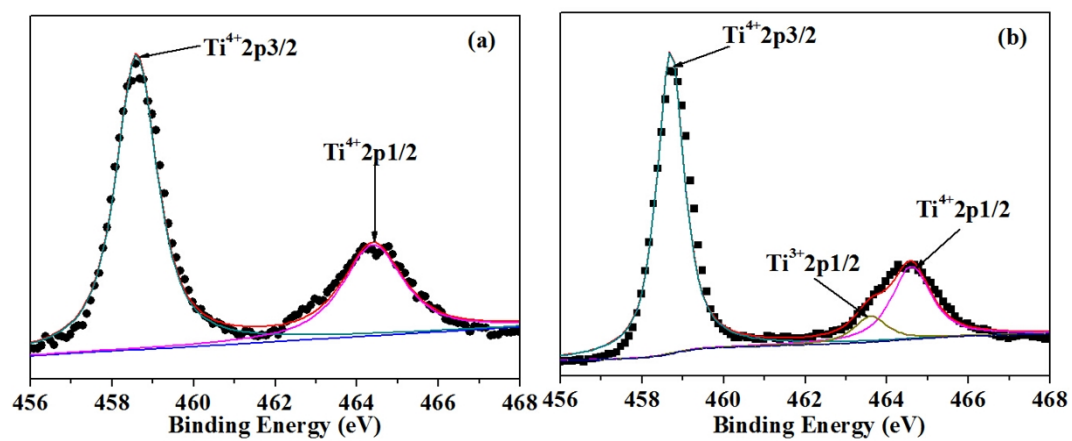

**Fig. S3:** The Raman spectra of oxidized (a) and reduced (b) TO, oxidized (c) and reduced (d) NTO.

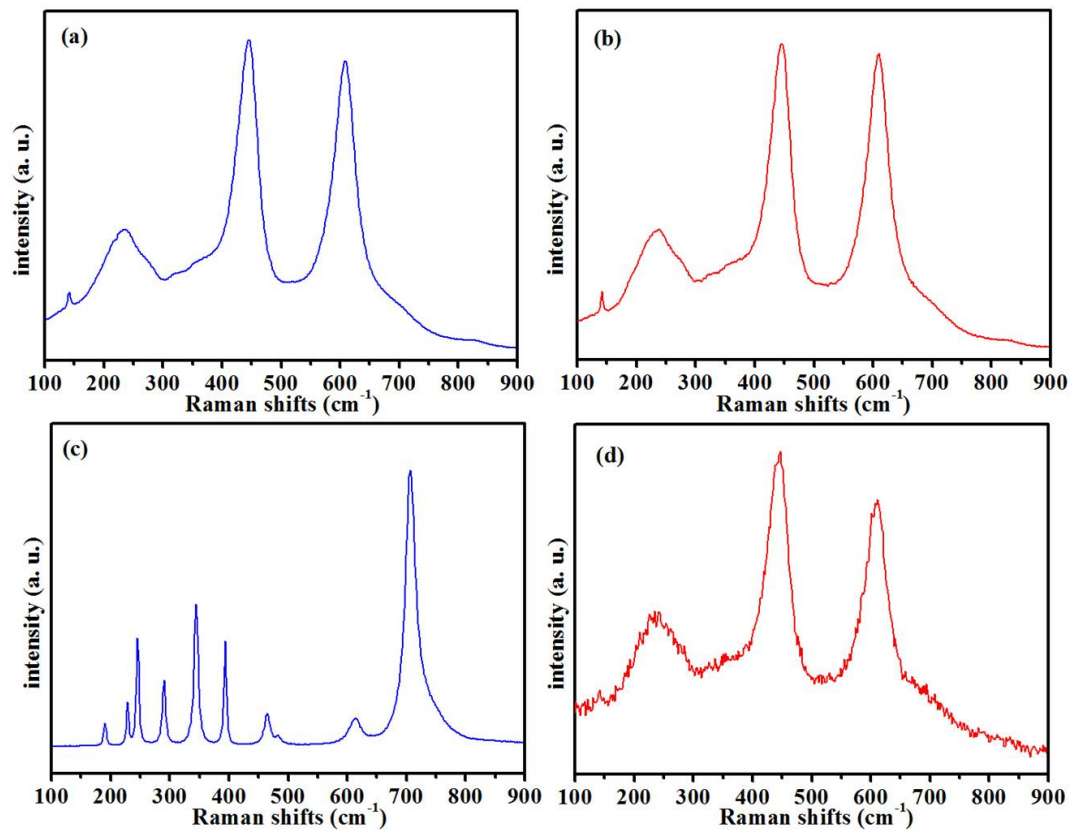

**Fig. S4:** The AC impedance spectra of symmetrical cells (a) TO-SDC/YSZ/TO-SDC and (b) NTO-SDC/YSZ/NTO-SDC at different current densities in pure hydrogen at 800 °C, respectively.

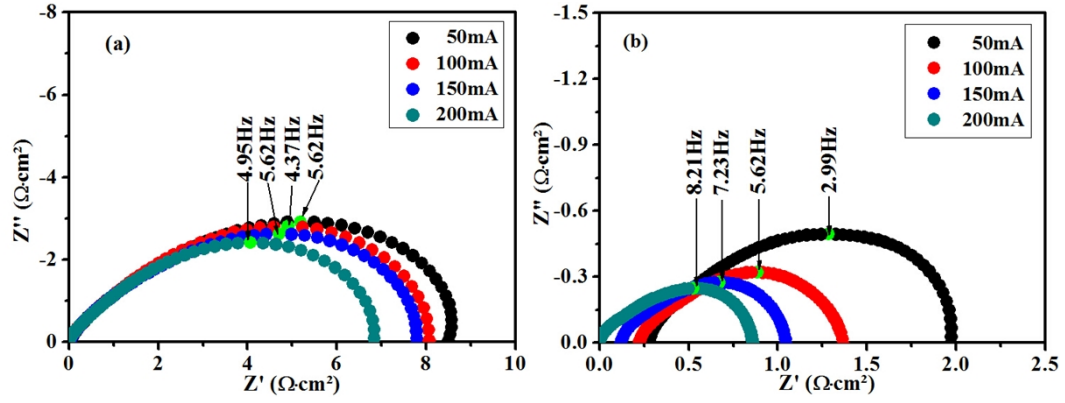

**Fig. S5:** Microstructure of the composite NTO-SDC cathode of solid oxide electrolyzer before testing (a) and after testing (b).

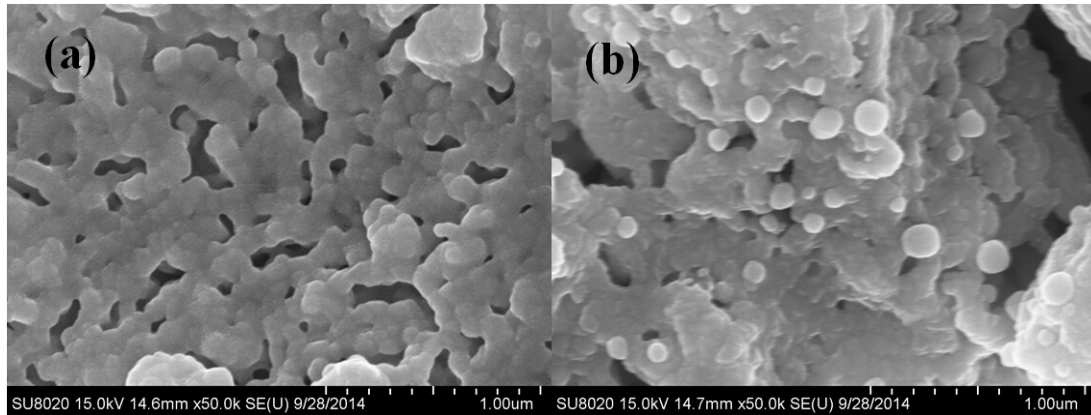

**Fig. S6** Short-term performance of single electrolyzer based on NTO composite cathode with the flow of CO<sub>2</sub> at 1.4 V at 800 °C.

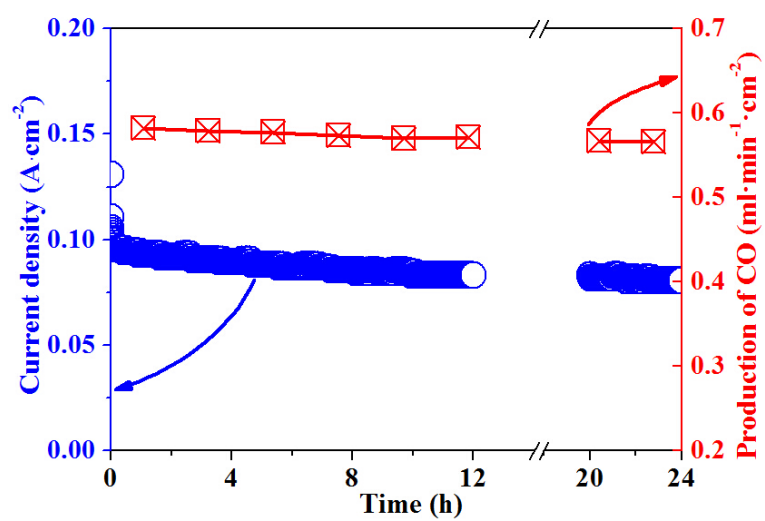

Supplement: c4cp06125j1.pdf [file c4cp06125j1.pdf]
